# Supplementary material for: Trends and disparities in the disease burden of stroke attributable to high alcohol use from 1990 to 2021 and projections to 2036: insights from the global burden of disease study 2021
Source: Research Square preprint supplement (doi:10.21203/rs.3.rs-7241101/v1), 2025-08-20
Supplement: Supplementary file 1 [file a9c5213091e06ac2c0b45d50.docx]

| **SUPPLEMENTARY TABLE 1** **The numbers, age-standardized rates and temporal trends of stroke burden attributable to high alcohol use across 204 countries and territories, 1990–2021.** | | | | | | | | | | | | | | | | | | | |
| --- | --- | --- | --- | --- | --- | --- | --- | --- | --- | --- | --- | --- | --- | --- | --- | --- | --- | --- | --- |
| Location | DALYs No. (95% UI) | | | | Deaths No. (95% UI) | | | | ASDR, per 100,000 No. (95% UI) | | | ASMR, per 100,000 No. (95% UI) | | | | EAPC (1990-2021) No. (95% CI) | | | |
|
| 1990 | | 2021 | | 1990 | | 2021 | | 1990 | 2021 | | 1990 | | 2021 | | For ASDR | | For ASMR | |
|
| Afghanistan | 0 (0–0) | 318.17 (6.82–807.34) | | 0 (0–0) | | 9.34 (0.84–24.14) | | 0 (0–0) | | | 2.47 (0.25–6.36) | | 0 (0–0) | | 0.09 (0.01–0.25) | | −2.15 (−3.89–−0.38) | | 6.25 (5.12–7.4) |
| Albania | 1892.55 (272.27–3958.87) | 5226.84 (1068.49–10652.25) | | 88.86 (11.32–187.66) | | 298.3 (50.84–622.06) | | 98.92 (14.42–205) | | | 119.25 (24.35–244.24) | | 5.04 (0.59–10.76) | | 6.95 (1.16–14.59) | | 0.69 (0.05–1.33) | | 1.16 (0.49–1.83) |
| Algeria | 1115.08 (205.81–2573.32) | 2832.76 (439.61–6433.97) | | 38.14 (7.01–88.35) | | 102.79 (13.1–240.57) | | 9.05 (1.7–20.54) | | | 8.01 (1.08–18.44) | | 0.4 (0.06–0.97) | | 0.37 (0.04–0.93) | | −0.31 (−0.4–−0.23) | | −0.03 (−0.14-0.09) |
| American Samoa | 5.19 (−0.56–20.19) | 6.42 (0.09–22.29) | | 0.17 (0–0.63) | | 0.21 (0.01–0.71) | | 21.51 (−0.34–79.95) | | | 12.6 (0.07–42.87) | | 0.78 (0.01–2.83) | | 0.46 (0.01–1.49) | | −1.95 (−3.05–−0.85) | | −1.93 (−2.98–−0.88) |
| Andorra | 43.52 (6.3–89.36) | 60.39 (8.4–119.43) | | 2.06 (0.25–4.37) | | 3.36 (0.41–6.92) | | 80.75 (11.09–167.42) | | | 37.12 (5.4–72.82) | | 4.29 (0.43–9.3) | | 1.91 (0.25–3.89) | | −2.44 (−2.65–−2.23) | | −2.45 (−2.69–−2.21) |
| Angola | 5391.74 (705.95–11982.65) | 19172.05 (3712.24–39295.98) | | 191.82 (31.05–411.69) | | 671.39 (132.17–1353.89) | | 137.14 (23.78–293.54) | | | 158.21 (32.35–319.44) | | 5.73 (1.12–11.67) | | 6.78 (1.43–13.74) | | 0.89 (0.49–1.29) | | 0.97 (0.56–1.39) |
| Antigua and Barbuda | 31.64 (4.49–69.96) | 77.83 (17.31–149.56) | | 1.38 (0.22–3.13) | | 3.32 (0.77–6.47) | | 62.8 (9.32–139.23) | | | 71.68 (16.24–137.72) | | 2.56 (0.39–5.76) | | 3.27 (0.75–6.49) | | −0.09 (−0.4-0.23) | | 0.28 (−0.07–0.62) |
| Argentina | 81690.83 (20786.21–146817.45) | 39799.81 (9109.91–73956.02) | | 3396.73 (803.27–6382.1) | | 1751.42 (383.78–3321.81) | | 254.97 (65.32–461.63) | | | 71.2 (16.38–132) | | 11.02 (2.67–21.06) | | 3.04 (0.7–5.75) | | −3.92 (−4.11–−3.74) | | −3.8 (−4.01–−3.6) |
| Armenia | 2020.56 (364.48–4337.29) | 2401.68 (279.7–5601.62) | | 70.72 (11.17–161.48) | | 92 (8.93–230.15) | | 71.48 (12.15–157.15) | | | 56.22 (6.7–130.99) | | 2.7 (0.38–6.49) | | 2.12 (0.21–5.34) | | −1.52 (−1.92–−1.12) | | −1.56 (−2–−1.11) |
| Australia | 19034.54 (2726.99–45278.31) | 19762.46 (3023.26–40628.38) | | 1019.7 (107.58–2547.67) | | 1117.62 (171.62–2317.37) | | 98.86 (14.02–234.42) | | | 40.49 (6.77–81.85) | | 5.51 (0.51–13.65) | | 2.07 (0.33–4.2) | | −2.95 (−3.03–−2.88) | | −3.2 (−3.28–−3.13) |
| Austria | 21136.56 (3105.01–43443.48) | 9124.63 (1276.22–18623.51) | | 1214.75 (119.71–2584.36) | | 452.66 (66.89–927.32) | | 172.47 (26.13–353.8) | | | 46.32 (7.01–93.81) | | 9.66 (1.06–20.26) | | 2.02 (0.34–4.12) | | −4.46 (−4.79–−4.12) | | −5.38 (−5.78–−4.99) |
| Azerbaijan | 7110.5 (1412.88–14331.02) | 8993.15 (1727.56–19527.7) | | 238.37 (42.71–493.66) | | 323.96 (60.04–726.76) | | 133.41 (26.71–268.73) | | | 85.03 (16.55–187.74) | | 4.83 (0.88–10.13) | | 3.53 (0.57–8.19) | | −1.27 (−1.51–−1.02) | | −0.56 (−0.86–−0.26) |
| Bahamas | 220.56 (44.89–426.27) | 244.13 (42.57–483.43) | | 7.67 (1.69–14.77) | | 8.69 (1.61–17.3) | | 132.9 (28.52–255.53) | | | 56.37 (10.68–111.05) | | 5.03 (1.16–9.67) | | 2.19 (0.41–4.44) | | −2.93 (−3.14–−2.72) | | −2.83 (−3.02–−2.64) |
| Bahrain | 53.55 (10.83–117.18) | 80.29 (16.72–178.03) | | 1.63 (0.33–3.55) | | 2.17 (0.45–4.72) | | 25.23 (5.5–56.41) | | | 6.99 (1.31–15.96) | | 1.1 (0.21–2.55) | | 0.3 (0.04–0.69) | | −4.91 (−5.18–−4.64) | | −4.97 (−5.28–−4.66) |
| Bangladesh | 1113.15 (−661.9–5561.91) | 12905.97 (−93.02–34535.59) | | 46.35 (−6.86–191.38) | | 455.48 (5.46–1237.5) | | 2.7 (−0.42–11.06) | | | 8.91 (0.01–23.67) | | 0.11 (0–0.42) | | 0.34 (0.01–0.93) | | 3.85 (3.07–4.63) | | 3.63 (2.82–4.45) |
| Barbados | 273.19 (62.19–571.03) | 367.6 (83.68–754.16) | | 12.76 (2.5–28.2) | | 17.66 (3.36–37.27) | | 99.04 (23.19–201.97) | | | 73 (16.66–151.07) | | 4.29 (0.91–9.41) | | 3.4 (0.66–7.16) | | −1.11 (−1.38–−0.84) | | −0.98 (−1.29–−0.66) |
| Belarus | 34055.92 (5124.45–72989.54) | 29011.6 (3852.61–64057.08) | | 1321.07 (158.82–3015.79) | | 1161.67 (113.38–2754.21) | | 261.66 (37.79–563.41) | | | 182.69 (26.12–394.84) | | 10.29 (1.23–23.83) | | 7.14 (0.73–16.79) | | −1.96 (−2.61–−1.31) | | −1.94 (−2.54–−1.33) |
| Belgium | 24830.4 (3995.91–50456.87) | 12973.12 (2284.13–25437.81) | | 1438.34 (180.11–2977.02) | | 760.37 (129.12–1511.51) | | 159.12 (26.96–320.64) | | | 51.07 (9.2–98.77) | | 9.05 (1.11–18.72) | | 2.61 (0.51–5.12) | | −3.5 (−3.56–−3.45) | | −3.77 (−3.85–−3.69) |
| Belize | 66.31 (13.09–132.12) | 168.5 (37.82–332.69) | | 2.52 (0.56–4.97) | | 6.02 (1.41–12.08) | | 70.01 (14.41–138.98) | | | 52.27 (11.71–103.46) | | 2.73 (0.61–5.38) | | 2.08 (0.52–4.16) | | −1.14 (−1.61–−0.68) | | −1.09 (−1.59–−0.58) |
| Benin | 1942.39 (285.78–4155.8) | 5430.43 (1065.7–11382.91) | | 77.6 (13.06–165.63) | | 199.02 (40.52–419.26) | | 98.87 (15.94–210.42) | | | 101.75 (20.74–209.75) | | 4.18 (0.68–8.91) | | 4.27 (0.82–8.88) | | 0.22 (0.05–0.39) | | 0.18 (0.03–0.34) |
| Bermuda | 69.81 (14.68–139.85) | 59.48 (11.34–122.74) | | 2.97 (0.57–6.45) | | 3 (0.48–6.53) | | 111.47 (23.42–226.56) | | | 44.47 (9.06–92.46) | | 4.99 (0.91–11.07) | | 2.04 (0.37–4.38) | | −2.99 (−3.22–−2.77) | | −2.93 (−3.13–−2.73) |
| Bhutan | 191.48 (33.17–422.03) | 67.12 (7.16–157.57) | | 6.51 (1.12–14.01) | | 2.61 (0.3–6.33) | | 74.08 (13.45–156.83) | | | 11.02 (1.24–26.25) | | 2.94 (0.55–6.41) | | 0.45 (0.05–1.1) | | −7.58 (−8.14–−7.01) | | −7.48 (−8.04–−6.91) |
| Bolivia | 3863.68 (586.79–8066.33) | 5804.95 (1128.44–11822.03) | | 150.26 (30.43–302.08) | | 241.78 (52.19–484.72) | | 119.34 (22.85–241.93) | | | 63.54 (13.43–128.71) | | 5.12 (1.14–10.12) | | 2.9 (0.63–5.77) | | −1.82 (−2.12–−1.52) | | −1.54 (−1.82–−1.26) |
| Bosnia and Herzegovina | 5495.7 (761.28–12133.87) | 8399.46 (744.9–18195.95) | | 220.8 (24.85–500.58) | | 414.88 (30.18–902.24) | | 136.61 (17.18–305.02) | | | 133.09 (12.81–287.38) | | 6.19 (0.61–14.22) | | 6.41 (0.49–13.97) | | −0.4 (−0.56–−0.24) | | −0.24 (−0.4–−0.07) |
| Botswana | 821.32 (147.15–1659.75) | 1144.68 (243.83–2332.34) | | 29.46 (5.84–59.05) | | 40.58 (9.08–80.23) | | 142.02 (28.47–284.82) | | | 75.45 (16.34–148.36) | | 5.84 (1.27–11.54) | | 3.1 (0.66–6.23) | | −2.5 (−2.9–−2.1) | | −2.43 (−2.79–−2.07) |
| Brazil | 142686.26 (33727.25–267569.61) | 144490.69 (31807.47–272631.4) | | 5156.37 (1128.52–9895.08) | | 5978.19 (1217.94–11790.35) | | 151.36 (35.67–286.41) | | | 56.87 (12.36–107.73) | | 6.14 (1.19–12.02) | | 2.42 (0.47–4.8) | | −3.31 (−3.44–−3.18) | | −3.04 (−3.2–−2.88) |
| Brunei | 37.74 (6.5–76.44) | 18.18 (−0.22–44.64) | | 1.25 (0.24–2.42) | | 0.56 (0.01–1.33) | | 34.3 (6.37–66.61) | | | 4.85 (0.06–11.74) | | 1.34 (0.26–2.68) | | 0.19 (0.01–0.46) | | −3.24 (−5.04–−1.4) | | −3.15 (−4.88–−1.4) |
| Bulgaria | 63166.78 (14475.35–120481.2) | 52151.3 (7589.58–104292.46) | | 2761.17 (523.3–5399.01) | | 2694.42 (305.46–5696.72) | | 539.56 (115.22–1058.04) | | | 369.04 (58.16–731.32) | | 26.91 (4.38–54.24) | | 18.16 (2.3–38.39) | | −1.64 (−1.8–−1.48) | | −1.5 (−1.65–−1.35) |
| Burkina Faso | 7719.66 (1570.95–14886.34) | 15402.18 (3387.75–29631.61) | | 301.02 (68.39–581.85) | | 607.61 (136.13–1183.94) | | 180.58 (40.2–346.24) | | | 167.09 (39.56–319.6) | | 8.13 (1.78–15.93) | | 7.68 (1.66–14.58) | | −0.25 (−0.4–−0.1) | | −0.15 (−0.32-0.02) |
| Burundi | 10713.11 (1637.33–21195.93) | 8965.59 (1429.13–17949.37) | | 394.22 (74.38–784.35) | | 314.78 (52.27–632.45) | | 442.06 (75.3–871.83) | | | 172.92 (29.39–348.08) | | 18 (3.47–35.37) | | 7.24 (1.42–14.75) | | −3.69 (−4.06–−3.32) | | −3.6 (−3.96–−3.24) |
| Cambodia | 3463.77 (463.68–7365.14) | 26083.56 (5130.48–49458.9) | | 120.06 (19.19–253.18) | | 940.69 (182.41–1764.03) | | 72.77 (11.34–151.74) | | | 201.35 (39.24–379.07) | | 2.83 (0.48–5.92) | | 8.43 (1.83–15.77) | | 2.75 (2.42–3.08) | | 3.03 (2.69–3.37) |
| Cameroon | 9902.27 (1598.54–19808.29) | 36394.02 (8023.71–70265.73) | | 365.2 (62.46–745.78) | | 1308.12 (301.32–2513.12) | | 219.44 (36.92–441.52) | | | 278.45 (64.42–532.42) | | 9.47 (1.78–19.1) | | 12.15 (2.89–23.9) | | 1.15 (0.78–1.52) | | 1.22 (0.87–1.56) |
| Canada | 16050.59 (2633.53–39764.28) | 24940.66 (3883.78–53738.55) | | 729.99 (86.53–2037.51) | | 1111.58 (163.46–2451.95) | | 49.71 (8.39–123.22) | | | 34.6 (5.91–73.86) | | 2.27 (0.27–6.4) | | 1.35 (0.22–2.96) | | −1.19 (−1.26–−1.12) | | −1.79 (−1.92–−1.67) |
| Cape Verde | 266.67 (50.12–541.87) | 707.16 (152.39–1359.49) | | 11.46 (2.03–23.81) | | 28.82 (5.7–57.32) | | 121.83 (22.36–245.87) | | | 156.33 (31.51–306.06) | | 4.96 (0.9–10.34) | | 6.79 (1.23–13.68) | | 0.25 (−0.11–0.62) | | 0.31 (−0.18–0.8) |
| Central African Republic | 2728.47 (375.38–6036.65) | 2825.87 (287.52–6598.34) | | 99.93 (15.25–222.41) | | 100.56 (11.27–229.44) | | 241.42 (41.02–535.91) | | | 128.36 (15.76–294.55) | | 10.44 (1.91–22.37) | | 5.58 (0.95–12.37) | | −1.89 (−1.96–−1.81) | | −1.86 (−1.93–−1.79) |
| Chad | 1375.94 (−49.96–4812.81) | 9662.94 (1458.16–23417.92) | | 56.28 (2.93–183.51) | | 348.85 (56.64–813.04) | | 50.65 (1.66–167.74) | | | 161.07 (26.08–375.94) | | 2.14 (0.13–6.88) | | 6.73 (1.05–16.02) | | 4.71 (4.18–5.24) | | 4.66 (4.15–5.18) |
| Chile | 19119.69 (4730.8–35516.03) | 17678.63 (3504.08–34761.38) | | 813.78 (164.25–1540.7) | | 841.56 (152.45–1684.91) | | 192.21 (45.81–359.42) | | | 68.52 (13.47–134.36) | | 8.75 (1.7–17.1) | | 3.2 (0.57–6.37) | | −2.98 (−3.21–−2.76) | | −2.79 (−3.02–−2.56) |
| China | 2016859.57 (418570.03–3923932.36) | 3602052.39 (897464.9–6807730.95) | | 77089.71 (17461.4–148300.06) | | 157399.09 (38071.1–298113.77) | | 240.75 (52.35–462.2) | | | 172.51 (42.43–325.53) | | 10.71 (2.51–20.56) | | 7.94 (1.85–14.91) | | −0.99 (−1.1–−0.87) | | −0.88 (−1.02–−0.75) |
| Colombia | 11667.06 (2480.38–22706.46) | 9093.25 (2019.24–19489.65) | | 434.64 (97.45–849.43) | | 364.43 (81.36–822.7) | | 63.78 (14.28–122.09) | | | 16.48 (3.64–35.29) | | 2.64 (0.6–5.36) | | 0.66 (0.15–1.49) | | −5.22 (−5.64–−4.8) | | −5.37 (−5.78–−4.97) |
| Comoros | 17.29 (−1.97–58.28) | 68.56 (8.88–167.2) | | 0.71 (0.01–2.21) | | 2.7 (0.46–6.36) | | 9.46 (0.01–30.1) | | | 14.06 (2.27–34.03) | | 0.42 (0.02–1.3) | | 0.63 (0.12–1.51) | | 1.61 (1.41–1.81) | | 1.61 (1.43–1.79) |
| Cook Islands | 4.54 (−0.22–18.1) | 31.71 (6.45–63.3) | | 0.16 (0–0.61) | | 1.19 (0.24–2.42) | | 35.11 (−0.8–137.51) | | | 129.85 (25.95–258.81) | | 1.32 (0–5.07) | | 4.73 (0.95–9.59) | | 5.38 (4.63–6.12) | | 5.24 (4.46–6.02) |
| Costa Rica | 902.13 (206.93–1780.79) | 1240.59 (283.82–2528.42) | | 41.22 (8.03–86.35) | | 56.23 (11.07–121.58) | | 52.63 (12.03–105.25) | | | 22.57 (5.17–45.82) | | 2.52 (0.49–5.31) | | 1.02 (0.2–2.19) | | −3.61 (−4.15–−3.08) | | −3.81 (−4.37–−3.24) |
|  |  |  | |  | |  | |  | | |  | |  | |  | |  | |  |
| Cuba | 6890.44 (1545.15–13787.89) | 10902.55 (2255.44–22288.56) | | 279.71 (60.29–588.26) | | 496.19 (86.73–1053.65) | | 67.78 (15.24–136.36) | | | 56.97 (12.05–115.47) | | 2.81 (0.6–5.95) | | 2.46 (0.45–5.21) | | −0.49 (−0.67–−0.3) | | −0.38 (−0.55–−0.21) |
| Cyprus | 1130.97 (198.09–2282.83) | 964.27 (190.1–1843.07) | | 63.67 (9.17–129.87) | | 57.18 (9.12–115.63) | | 179.57 (26.52–368.31) | | | 49.09 (9.48–96.42) | | 12.35 (1.24–25.64) | | 3.15 (0.44–6.6) | | −4.35 (−4.48–−4.21) | | −4.56 (−4.68–−4.44) |
| Czech Republic | 56287.88 (6083.22–115908.66) | 20479.94 (2391.01–42044.33) | | 2864.48 (222–6186.66) | | 1014.76 (101.7–2177.31) | | 404.73 (44.39–831.95) | | | 92.65 (12.36–189.39) | | 20.81 (1.62–45.08) | | 4.32 (0.48–9.22) | | −5.05 (−5.28–−4.81) | | −5.49 (−5.84–−5.13) |
| Democratic Republic of the Congo | 18426.37 (2528.8–40044.01) | 35187.86 (4870.6–81867.61) | | 725.65 (120.12–1495.64) | | 1358.57 (202.31–3121.89) | | 127.6 (21.22–260.94) | | | 101.63 (14.09–230.61) | | 5.95 (1.03–12.41) | | 4.66 (0.75–10.36) | | −0.55 (−2.01-0.93) | | −0.64 (−2.02-0.76) |
| Denmark | 14109.74 (1975.68–28129.44) | 7640.04 (1338.67–15209.67) | | 793.55 (99.13–1594) | | 455.34 (71.64–920.5) | | 166.54 (25.69–329.87) | | | 59.36 (10.62–117.33) | | 8.94 (1.15–17.99) | | 3.28 (0.56–6.58) | | −3.76 (−4.03–−3.49) | | −3.69 (−3.96–−3.42) |
| Djibouti | 74.26 (−2.1–210.31) | 22.7 (−43.26–95.43) | | 2.64 (0.12–6.77) | | 1.2 (−0.35–3.73) | | 54.82 (3.1–135.41) | | | 5.08 (−1.42–15.93) | | 2.28 (0.27–5.37) | | 0.25 (0.01–0.69) | | −9.09 (−9.89–−8.28) | | −8.48 (−9.21–−7.74) |
| Dominica | 74.88 (17.04–146.95) | 79.51 (18–156.23) | | 3.37 (0.75–6.69) | | 3.34 (0.77–6.82) | | 127.89 (28.87–251.15) | | | 93.69 (21.12–185.46) | | 5.69 (1.27–11.24) | | 4.06 (0.94–8.29) | | −0.97 (−1.15–−0.79) | | −1.11 (−1.26–−0.96) |
| Dominican Republic | 3615.94 (647–7538.97) | 8987.24 (2023.34–17865.3) | | 124.12 (26.51–254.49) | | 325.95 (72.38–662.98) | | 91.18 (18.71–186.83) | | | 87.3 (20.12–174.13) | | 3.47 (0.78–7.18) | | 3.27 (0.71–6.69) | | 0.04 (−0.16–0.24) | | 0.02 (−0.23–0.27) |
| Ecuador | 2432.6 (324.7–5433.79) | 3942.66 (846.35–8207.36) | | 83.09 (15.28–172.06) | | 145.58 (31.36–303.06) | | 43.65 (6.97–90.57) | | | 23.74 (5.28–49.2) | | 1.58 (0.32–3.28) | | 0.91 (0.19–1.87) | | −1.57 (−2.05–−1.09) | | −1.38 (−1.86–−0.89) |
| Egypt | 1844.31 (341.83–4280.41) | 4115.08 (644.05–9835.92) | | 59.93 (10.39–138.05) | | 135.25 (18.82–325.41) | | 6.06 (1.05–13.95) | | | 5.92 (0.81–14.04) | | 0.24 (0.03–0.56) | | 0.24 (0.03–0.61) | | 0.83 (0.46–1.2) | | 0.98 (0.59–1.37) |
| El Salvador | 1210.22 (247.08–2528.2) | 1345.91 (296.23–2775.15) | | 47.83 (10.61–97.07) | | 54.93 (11.91–120.7) | | 41 (8.93–83.97) | | | 21.98 (4.8–44.71) | | 1.66 (0.37–3.37) | | 0.87 (0.19–1.89) | | −2.84 (−3.38–−2.3) | | −2.93 (−3.42–−2.43) |
| Equatorial Guinea | 325.61 (35.49–777.86) | 705.86 (142.57–1494.3) | | 12.57 (1.81–28.59) | | 27.64 (6.13–58.59) | | 172.18 (24.3–397.12) | | | 148.25 (30.79–311.87) | | 7.58 (1.21–17.17) | | 7.04 (1.5–14.91) | | −0.78 (−0.96–−0.59) | | −0.5 (−0.66–−0.33) |
| Eritrea | 1252.25 (−23.18–3367.22) | 1357.85 (−25.79–3556.61) | | 40.42 (1.24–101.43) | | 47.35 (4.37–111.24) | | 98.35 (4.66–238.45) | | | 46.84 (4.9–110.58) | | 3.72 (0.37–8.86) | | 1.89 (0.29–4.27) | | −3.84 (−4.32–−3.37) | | −3.57 (−4.02–−3.12) |
| Estonia | 4943.52 (592.9–10988.94) | 1753.3 (176.71–4170.05) | | 212.53 (17.82–507.76) | | 78.93 (5.91–208.29) | | 240.16 (28.69–537.52) | | | 69.67 (8.56–158.17) | | 10.37 (0.85–25.16) | | 2.71 (0.24–6.69) | | −5.24 (−5.83–−4.64) | | −5.65 (−6.3–−5) |
| Eswatini | 494.49 (94.24–1021.63) | 839.27 (138.77–1770.47) | | 19 (3.93–39.52) | | 30.59 (6.1–62.29) | | 175.99 (36.92–367.12) | | | 147.69 (31.4–297.64) | | 7.82 (1.84–16.1) | | 6.37 (1.51–12.75) | | −0.3 (−0.89-0.3) | | −0.32 (−0.86-0.22) |
| Ethiopia | 16940.43 (30.12–45613.11) | 35724.76 (5554.15–79234.07) | | 608.25 (27.87–1565.95) | | 1375.63 (246–2898.61) | | 81.77 (3.62–210.9) | | | 82.4 (14.8–173.24) | | 3.22 (0.27–7.86) | | 3.56 (0.71–7.34) | | −0.06 (−0.77-0.65) | | 0.27 (−0.4–0.95) |
| Fiji | 339.03 (42.34–727.06) | 576.47 (91.37–1265.21) | | 10 (1.28–21.39) | | 18.43 (2.86–40.11) | | 78.57 (10.21–168.02) | | | 69.6 (12.17–149.3) | | 2.84 (0.42–6.13) | | 2.56 (0.45–5.47) | | −0.49 (−0.84–−0.14) | | −0.52 (−0.88–−0.16) |
| Finland | 9474.09 (1234.86–20153.45) | 6774.77 (1030.36–13819.44) | | 459.12 (45.79–998.84) | | 359.64 (51.95–756.77) | | 131.87 (18.15–276.73) | | | 50.34 (8.33–102.47) | | 6.3 (0.65–13.72) | | 2.31 (0.38–4.72) | | −2.9 (−2.99–−2.82) | | −3.05 (−3.15–−2.95) |
| France | 112973.41 (19156.93–223735.23) | 73032.21 (11660.37–145416.37) | | 6720.14 (786.91–13838.57) | | 4389.55 (670.79–8929.03) | | 132.14 (24.22–259.13) | | | 46.53 (8.53–90.63) | | 7.47 (0.9–15.26) | | 2.29 (0.42–4.53) | | −3.34 (−3.44–−3.23) | | −3.75 (−3.86–−3.64) |
| Gabon | 1673.34 (314.01–3454.92) | 1944.2 (367.87–4027.14) | | 69.76 (13.87–140.99) | | 76.34 (17.38–151.6) | | 298.76 (57.99–609.53) | | | 192.18 (42.22–385.81) | | 13.49 (2.79–26.66) | | 8.84 (1.98–17.51) | | −1.58 (−1.68–−1.49) | | −1.54 (−1.64–−1.44) |
| Gambia | 315.71 (41.32–722.29) | 1671.75 (309.3–3409.07) | | 11.97 (2.1–26.72) | | 64.23 (13.54–131.04) | | 92.06 (15.72–203.33) | | | 169.84 (35.17–343.61) | | 3.89 (0.69–8.54) | | 7.4 (1.45–15.32) | | 1.81 (1.24–2.38) | | 1.95 (1.4–2.51) |
| Georgia | 11430.05 (2191.28–24067.08) | 11193.23 (2216.04–23976.46) | | 433.42 (73.02–937.67) | | 515.13 (81.17–1182.34) | | 179.47 (34.46–379.39) | | | 193.02 (40.67–409.91) | | 6.95 (1.14–15.17) | | 8.34 (1.44–18.84) | | 0.54 (0.09–0.99) | | 1.05 (0.64–1.47) |
| Germany | 255673.2 (31261.63–531822.69) | 139660.63 (18272.91–280861.55) | | 14343.31 (1172.11–30978.89) | | 7302.77 (951.53–14792.01) | | 194.98 (27.14–401.74) | | | 67.4 (10.09–135.92) | | 10.61 (0.95–22.87) | | 3.07 (0.46–6.15) | | −3.49 (−3.71–−3.27) | | −4.04 (−4.28–−3.81) |
| Ghana | 16926.84 (2870.49–35433.44) | 44943.15 (9588.45–88346.16) | | 593.36 (119.94–1221.64) | | 1586.05 (356.65–3178.32) | | 260.26 (49.89–535.74) | | | 254.78 (56.32–507.94) | | 10.8 (1.81–21.5) | | 10.73 (2.19–21.69) | | 0.12 (−0.16–0.4) | | 0.15 (−0.13–0.43) |
| Greece | 33204.78 (6197.25–67574.4) | 19217.83 (3562.74–37405.62) | | 1932.01 (283.66–3916.89) | | 1223.31 (208.23–2446.11) | | 220.48 (40.92–452.25) | | | 73.37 (15.8–138.73) | | 13.27 (1.86–27) | | 3.88 (0.7–7.56) | | −4.11 (−4.34–−3.88) | | −4.59 (−4.89–−4.3) |
| Greenland | 59.12 (12.75–130.39) | 68.03 (14.69–135.83) | | 1.99 (0.38–4.62) | | 2.58 (0.56–5.22) | | 169.94 (32.5–394.89) | | | 101.95 (22.08–206.71) | | 7.3 (1.08–19.4) | | 4.58 (0.89–9.9) | | −1.41 (−1.49–−1.32) | | −1.23 (−1.36–−1.1) |
| Grenada | 115.56 (24.62–242.92) | 103.11 (22.61–206.64) | | 5.31 (1.01–11.76) | | 4.17 (0.9–8.41) | | 168.26 (35.6–344.1) | | | 87.8 (19.83–176.64) | | 7.09 (1.5–15.33) | | 3.78 (0.88–7.68) | | −2.43 (−2.67–−2.19) | | −2.42 (−2.81–−2.02) |
| Guam | 28.27 (−1.63–95.6) | 103.46 (13.73–253.18) | | 0.89 (−0.01–2.83) | | 3.08 (0.39–7.46) | | 33.75 (−0.54–108.54) | | | 51.99 (6.7–129.19) | | 1.25 (0–3.91) | | 1.49 (0.19–3.64) | | 2.38 (2.03–2.73) | | 1.52 (1.16–1.88) |
| Guatemala | 1469.14 (293.04–3099.53) | 2388.12 (489.53–5056.22) | | 53.2 (11.76–106.65) | | 95.23 (20.99–209.36) | | 41.22 (8.81–82.25) | | | 21.22 (4.48–44.6) | | 1.78 (0.37–3.67) | | 0.91 (0.2–2.04) | | −2.88 (−3.21–−2.55) | | −2.84 (−3.15–−2.53) |
| Guinea | 1503.85 (161.46–3615.8) | 4426.97 (750.14–10208.9) | | 62.77 (8.96–146.57) | | 174.76 (32.43–385.86) | | 46.51 (5.46–109.52) | | | 79.51 (14.96–176.55) | | 2.08 (0.28–4.9) | | 3.46 (0.54–7.57) | | 1.35 (0.84–1.85) | | 1.23 (0.72–1.73) |
| Guinea-Bissau | 1240.71 (225.94–2506.88) | 1893.21 (408.4–3823.35) | | 44.05 (9.29–87.96) | | 62.56 (14.53–123.91) | | 299.68 (62.67–596.34) | | | 237.05 (55.94–462.56) | | 12.1 (2.59–23.7) | | 9.66 (2.24–18.66) | | −0.7 (−0.9–−0.5) | | −0.68 (−0.88–−0.48) |
| Guyana | 1800.06 (389.98–3490.34) | 1019.14 (216.33–2051.7) | | 63.54 (14.77–122.66) | | 37.34 (8.46–77.6) | | 443.48 (100.41–835.98) | | | 150.34 (31.55–306.24) | | 17.08 (4.03–33.52) | | 6.08 (1.35–12.81) | | −3.1 (−3.3–−2.9) | | −2.93 (−3.12–−2.74) |
| Haiti | 9331.32 (1674.52–19394.44) | 14105.58 (2857.13–30361.44) | | 331.22 (68.98–683.04) | | 509.22 (112.08–1102.18) | | 271.53 (56.2–559.97) | | | 184.68 (40.99–398.6) | | 10.98 (2.54–22.58) | | 8 (1.79–17.32) | | −1.07 (−1.17–−0.97) | | −0.84 (−0.91–−0.77) |
| Honduras | 1126.86 (224.02–2333.64) | 3625.75 (768.05–7377.26) | | 43.18 (9.67–87.34) | | 149.3 (31.94–306.53) | | 53.69 (11.5–107.37) | | | 56.71 (12.13–114.43) | | 2.28 (0.51–4.71) | | 2.59 (0.57–5.37) | | 0.26 (0.14–0.37) | | 0.58 (0.44–0.72) |
| Hungary | 57593.24 (9875.8–113967.01) | 21866.89 (2394.25–45630.41) | | 2591.96 (332.04–5308.15) | | 1035.25 (89.62–2266.49) | | 397.5 (69.57–785.86) | | | 113.39 (15.29–235.5) | | 18.23 (2.29–38.01) | | 4.96 (0.51–10.67) | | −4.57 (−4.8–−4.34) | | −4.67 (−4.9–−4.44) |
| Iceland | 181.97 (20.22–391.87) | 218.21 (35.78–442.35) | | 9.95 (0.92–22.16) | | 12.21 (1.91–25.56) | | 61.68 (7.16–131.87) | | | 34.83 (6.03–70.5) | | 3.24 (0.32–7.14) | | 1.75 (0.3–3.62) | | −1.77 (−1.94–−1.6) | | −1.87 (−2.1–−1.63) |
| India | 226108.04 (36559.99–483249.89) | 662188.53 (162459.05–1344090.89) | | 7804.24 (1329.38–16895.62) | | 24475.32 (6039.52–51205.68) | | 45.88 (7.92–98.33) | | | 53.43 (13.27–108.47) | | 1.8 (0.31–3.97) | | 2.13 (0.51–4.49) | | 0.71 (0.43–0.98) | | 0.75 (0.47–1.04) |
| Indonesia | 20028.66 (2435.74–47792.57) | 46199.78 (7535.9–108768.95) | | 628.79 (98.3–1456.97) | | 1508.92 (267.74–3480.62) | | 18.08 (2.79–41.71) | | | 17.18 (2.98–39.64) | | 0.65 (0.12–1.52) | | 0.65 (0.12–1.49) | | −0.43 (−0.62–−0.23) | | −0.32 (−0.51–−0.13) |
| Iran | −1.91 (−11.14–0.1) | 5335.75 (689.02–12811.91) | | −0.02 (−0.14–0) | | 183.95 (18.66–466.55) | | 0 (−0.02–0) | | | 6.42 (0.71–15.84) | | 0 (0–0) | | 0.25 (0.02–0.65) | | 8.94 (7.12–10.08) | | 8.94 (7.12–10.8) |
| Iraq | 1067.3 (217.82–2428.22) | 1543.48 (308.25–3582.28) | | 37.08 (6.39–83.88) | | 54.07 (9.58–130.35) | | 12.22 (2.3–27.26) | | | 5.99 (1.07–14.26) | | 0.47 (0.08–1.08) | | 0.26 (0.04–0.63) | | −2.96 (−3.19–−2.73) | | −2.68 (−2.97–−2.39) |
| Ireland | 5175.8 (732.24–11098.36) | 2653.05 (432.96–5434.52) | | 279.03 (28.22–620.2) | | 152.54 (20.45–318.91) | | 125.82 (18.09–267.85) | | | 32.28 (5.54–66.55) | | 7.01 (0.69–15.48) | | 1.77 (0.25–3.67) | | −4.69 (−4.93–−4.45) | | −4.59 (−4.83–−4.36) |
| Israel | 1047.73 (89.84–2510.31) | 2017.45 (338.33–4164.57) | | 52.01 (4.82–117.16) | | 93.63 (15.68–191.47) | | 21.99 (2.06–52.47) | | | 15.96 (2.78–32.93) | | 1.12 (0.1–2.56) | | 0.69 (0.12–1.39) | | −1.1 (−1.22–−0.97) | | −1.68 (−1.82–−1.55) |
| Italy | 153355.86 (22674.07–309027.56) | 84369.06 (16682.73–165631.79) | | 8861.37 (1090.83–18299.1) | | 5701.97 (969.82–11529.41) | | 170.81 (26.44–345.84) | | | 50.28 (10.22–97.56) | | 9.95 (1.21–20.66) | | 2.9 (0.6–5.71) | | −4.12 (−4.34–−3.91) | | −4.15 (−4.35–−3.94) |
| Ivory Coast | 9864.68 (1723.56–20718.75) | 30117.58 (7328.91–57311.38) | | 344.05 (66.04–707.48) | | 1083.19 (247.24–2078.53) | | 243.67 (48.25–495.6) | | | 263.18 (58.6–504.14) | | 10.56 (2.04–20.95) | | 11.72 (2.35–23.48) | | −0.17 (−0.4-0.05) | | −0.04 (−0.24-0.16) |
| Jamaica | 1424.78 (325.94–2959.39) | 2021.47 (410.64–4222.62) | | 62.33 (12.48–131.93) | | 91.11 (17.59–193.66) | | 82.54 (18.92–172.14) | | | 65.59 (13.23–136.9) | | 3.46 (0.74–7.29) | | 2.9 (0.58–6.16) | | −0.34 (−0.89-0.22) | | −0.14 (−0.67-0.39) |
| Japan | 234312.9 (41162.08–445496.26) | 190939.91 (35095.11–374007.62) | | 10940.21 (2022.26–21426.18) | | 10125.12 (2081.49–20179) | | 141.18 (24.19–269.73) | | | 54.28 (10.27–101.59) | | 6.98 (1.26–13.87) | | 2.1 (0.43–4.04) | | −3.37 (−3.54–−3.2) | | −4.19 (−4.37–−4.01) |
| Jordan | 92.55 (16.19–212.09) | 260.15 (39.15–634.53) | | 3.16 (0.49–7.57) | | 8.44 (1.05–20.27) | | 6.52 (1.04–15.78) | | | 3.33 (0.37–8.44) | | 0.27 (0.04–0.68) | | 0.14 (0.01–0.35) | | −2.51 (−3.05–−1.97) | | −2.61 (−3.16–−2.05) |
| Kazakhstan | 33690 (6842.91–72617.58) | 32074.32 (6444.23–68086.05) | | 1172.29 (206.67–2688.5) | | 1171.98 (213.9–2671.7) | | 257.36 (49.68–563.95) | | | 174.41 (34.01–380.04) | | 9.63 (1.57–23.18) | | 7.17 (1.19–17.36) | | −2.15 (−2.68–−1.61) | | −1.71 (−2.17–−1.24) |
| Kenya | 10318.54 (1779.56–21819.46) | 26957.23 (5094.26–53270.78) | | 404.54 (74.24–815.58) | | 1004.25 (212.1–1923.03) | | 127.55 (23.72–259.5) | | | 116.33 (25.41–219.76) | | 5.71 (1.05–11.62) | | 5.06 (1.11–9.59) | | −0.14 (−0.32-0.03) | | −0.25 (−0.39–−0.12) |
| Kiribati | 42.4 (1.46–116.99) | 40.03 (−0.68–130.77) | | 1.21 (0.06–3.22) | | 1.11 (0.01–3.47) | | 96.84 (6.04–255.31) | | | 44.78 (−0.26–139.07) | | 3.15 (0.3–8.25) | | 1.45 (0.06–4.44) | | −3.05 (−3.45–−2.65) | | −3.06 (−3.43–−2.68) |
| Kuwait | 0 (0–0) | 23.89 (−0.07–72.63) | | 0 (0–0) | | 0.6 (0.01–1.87) | | 0 (0–0) | | | 0.56 (−0.01–1.86) | | 0 (0–0) | | 0.02 (0–0.07) | | −5.21 (−6.78–−3.61) | | −3.72 (−4.59–−2.84) |
| Kyrgyzstan | 5070.49 (1230.2–10171.09) | 5462.46 (989.6–11658.96) | | 162.94 (37.53–339.88) | | 167.37 (28.35–376.58) | | 163.66 (39.66–329.9) | | | 98.23 (16.95–217.64) | | 5.44 (1.23–11.57) | | 3.29 (0.52–7.7) | | −2.23 (−3.12–−1.34) | | −2.04 (−2.93–−1.14) |
| Laos | 7492.22 (1302.02–15735.31) | 15803.89 (3546.84–30737.1) | | 249.52 (45.61–504.63) | | 530.59 (133.53–1011.74) | | 330.62 (59.29–675.79) | | | 310.31 (77.64–589.73) | | 12.13 (2.45–24.4) | | 12.21 (2.92–22.91) | | −0.16 (−0.47-0.15) | | 0.06 (−0.28–0.39) |
| Latvia | 9863.96 (1383.29–21470.32) | 7246.26 (642.08–17586.36) | | 437.23 (43.48–1023.93) | | 370.33 (19.04–999.83) | | 273.55 (39.19–596.13) | | | 184.89 (21.79–425.51) | | 12.16 (1.22–28.7) | | 8.38 (0.64–21.43) | | −2.08 (−2.47–−1.69) | | −2 (−2.39–−1.6) |
| Lebanon | 1674.31 (359.37–3408.31) | 899.79 (167.17–2013.52) | | 60.8 (12.68–129.92) | | 36.7 (5.06–84.07) | | 74.37 (15.98–154.29) | | | 14.8 (2.83–33.23) | | 3.03 (0.61–6.62) | | 0.58 (0.08–1.31) | | −5.3 (−5.7–−4.89) | | −5.5 (−5.86–−5.14) |
| Lesotho | 1064.01 (175.19–2233.48) | 2418.52 (435.94–5207.65) | | 42.78 (8.15–87.35) | | 87.85 (16.84–181.23) | | 125.4 (22.15–260.99) | | | 213.5 (40.01–449.88) | | 5.36 (1.11–10.84) | | 8.44 (1.7–17.5) | | 2.45 (2.04–2.87) | | 2.23 (1.86–2.6) |
| Liberia | 2443.68 (517.45–4875) | 3776.02 (740.94–7319.12) | | 92.83 (20.92–183.55) | | 127.46 (28.34–243.08) | | 209.73 (46.14–413.91) | | | 160.2 (36.45–302.78) | | 8.88 (1.99–17.7) | | 6.72 (1.29–12.9) | | −1.23 (−1.39–−1.07) | | −1.28 (−1.43–−1.12) |
| Libya | −1.77 (−6.68–2.83) | 265.35 (43.89–613.79) | | 0 (−0.07–0.09) | | 8.33 (1.27–20.54) | | 0 (−0.12–0.15) | | | 4.35 (0.66–10.63) | | 0 (0–0.01) | | 0.17 (0.02–0.44) | | 1.34 (0.52–2.17) | | 10.88 (6.83–15.09) |
| Lithuania | 7815.22 (996.6–17449.66) | 7021.05 (673.63–16830.09) | | 320.46 (29.8–756.44) | | 333.89 (20.82–885.48) | | 173.28 (21.85–386.79) | | | 127.05 (14.74–289.83) | | 7.09 (0.65–16.76) | | 5.33 (0.44–13.4) | | −0.88 (−1.33–−0.42) | | −1.07 (−1.51–−0.62) |
| Luxembourg | 1364.3 (210.43–2707.98) | 577.87 (112.42–1113.11) | | 78.64 (9.76–163.02) | | 35.11 (7.02–69.33) | | 249.48 (39.46–493.91) | | | 51.28 (10.51–98.33) | | 14.6 (1.78–30.29) | | 2.88 (0.55–5.64) | | −5.08 (−5.21–−4.96) | | −5.05 (−5.16–−4.93) |
| Madagascar | 9611.31 (941.31–21280.62) | 12701.98 (1104.34–31218.92) | | 352.69 (45.58–725.77) | | 432.31 (65.43–1011.11) | | 184.38 (22.48–384.25) | | | 105.41 (17.45–242.52) | | 7.55 (1.09–15.5) | | 4.33 (0.83–9.45) | | −1.94 (−2.45–−1.44) | | −1.95 (−2.44–−1.47) |
| Malawi | 3370.09 (537.66–6959.56) | 9400.91 (1765.4–19273.87) | | 124.7 (21.92–249.56) | | 327.15 (72.37–648.22) | | 87 (15.31–174.43) | | | 117.92 (26.17–232.22) | | 3.76 (0.73–7.39) | | 4.81 (1.05–9.13) | | 0.81 (0.56–1.06) | | 0.65 (0.42–0.88) |
| Malaysia | 7374.28 (1553.19–15886.23) | 8941.27 (1897.49–19094.53) | | 251.77 (58.18–527.39) | | 297.14 (63.9–639.81) | | 74.62 (17.14–158.03) | | | 29.78 (6.29–64.02) | | 2.81 (0.68–5.81) | | 1.08 (0.24–2.31) | | −3.27 (−3.63–−2.91) | | −3.47 (−3.77–−3.16) |
| Maldives | 15.92 (−5.84–68.81) | 64.28 (2.68–158.4) | | 0.6 (−0.05–2.2) | | 2.02 (0.23–4.75) | | 18.75 (−2.5–70.38) | | | 15.58 (1.7–36.71) | | 0.77 (−0.01–2.68) | | 0.62 (0.09–1.44) | | −4.23 (−6.02–−2.41) | | −4.17 (−6.01–−2.3) |
| Mali | 1964.49 (356.7–4080.68) | 3335.56 (682.98–6911.67) | | 78.45 (14.1–161.82) | | 131.75 (27.14–277.72) | | 52.09 (9.32–109.02) | | | 39.31 (7.87–82.5) | | 2.45 (0.44–5.31) | | 1.86 (0.34–3.99) | | −0.89 (−0.97–−0.81) | | −0.87 (−0.97–−0.77) |
| Malta | 443.15 (73.52–923.26) | 321.66 (59.28–652.83) | | 22.8 (3.07–48.89) | | 18.13 (3.17–37.81) | | 104.71 (17.11–219.47) | | | 31.66 (6.33–64.09) | | 5.62 (0.72–12.31) | | 1.62 (0.3–3.36) | | −3.83 (−3.97–−3.68) | | −3.89 (−4.09–−3.69) |
| Marshall Islands | 21.51 (1.38–53.18) | 49.79 (5.02–115.87) | | 0.64 (0.05–1.56) | | 1.41 (0.13–3.25) | | 108.66 (9.03–263.34) | | | 115.34 (12.91–266.67) | | 3.75 (0.46–8.92) | | 4.08 (0.56–9.36) | | 0.31 (0.22–0.4) | | 0.47 (0.33–0.6) |
| Mauritania | 0 (0–0) | 0 (0–0) | | 0 (0–0) | | 0 (0–0) | | 0 (0–0) | | | 0 (0–0) | | 0 (0–0) | | 0 (0–0) | | −18.76 (−25.43–−11.32) | | −10.43 (−25.52-7.2) |
| Mauritius | 1774.99 (348.71–3263.7) | 1467.54 (309.52–2740.19) | | 62.13 (13.79–112.86) | | 53.88 (11.54–99.7) | | 230.12 (47.69–419.24) | | | 80.82 (16.21–151.69) | | 8.76 (1.94–16.16) | | 3.02 (0.64–5.68) | | −4.75 (−5.47–−4.03) | | −4.97 (−5.73–−4.2) |
| Mexico | 21101.87 (4505.3–42116.88) | 39436.06 (8200.29–77450.89) | | 842.82 (176.67–1767.15) | | 1492.93 (327.87–3082.56) | | 50.62 (10.75–103.75) | | | 30.35 (6.25–59.81) | | 2.31 (0.44–5.01) | | 1.22 (0.25–2.55) | | −2.11 (−2.4–−1.81) | | −2.41 (−2.67–−2.15) |
| Micronesia | 140.82 (15.16–293.21) | 104.78 (10.36–240.38) | | 4.41 (0.56–9.07) | | 3.09 (0.34–7.02) | | 258.02 (31.71–530.77) | | | 121.28 (14.7–277.47) | | 8.98 (1.22–18.42) | | 4.09 (0.61–9.27) | | −2.77 (−2.93–−2.6) | | −2.91 (−3.09–−2.73) |
| Moldova | 16440.52 (3347.4–31719.12) | 11528.16 (2053.03–24013.92) | | 650.05 (105.3–1309.95) | | 463.25 (68.1–1011.59) | | 374.05 (72.1–745.39) | | | 193.54 (35.76–401.05) | | 16.19 (2.43–34.76) | | 7.66 (1.15–16.7) | | −2.89 (−3.17–−2.6) | | −3.15 (−3.4–−2.9) |
| Monaco | 88.49 (0.08–247.32) | 57.59 (0.42–154.96) | | 5.51 (0.01–15.61) | | 3.66 (0.03–10.28) | | 116.38 (−0.34–323.68) | | | 53.32 (0.02–139.75) | | 6.62 (0.01–18.61) | | 2.96 (0.02–8.09) | | −2.66 (−2.89–−2.43) | | −2.73 (−2.98–−2.47) |
| Mongolia | 1868.13 (141.68–4221.86) | 5691.07 (766.49–11694.55) | | 63.29 (4.27–144.28) | | 176.46 (21.85–364.12) | | 170.37 (13.06–378.98) | | | 210.4 (27.51–429.36) | | 6.07 (0.41–14) | | 7.64 (1–16.16) | | 1.54 (0.88–2.2) | | 1.64 (0.98–2.3) |
| Montenegro | 1819.2 (301.19–3533.94) | 2535.93 (539.81–4891.07) | | 83.74 (13.5–165.05) | | 136.32 (26.21–267.17) | | 294.16 (49.65–568.74) | | | 266.22 (54.18–518.53) | | 14.19 (2.3–28.03) | | 15.19 (2.94–30.1) | | −0.5 (−0.73–−0.28) | | 0.13 (−0.12–0.38) |
| Morocco | 888.26 (166.32–1971.54) | 1041.07 (183.04–2347.9) | | 22.31 (4.34–49.73) | | 29.01 (4.94–66.59) | | 5.08 (1.01–11.22) | | | 2.73 (0.48–6.14) | | 0.14 (0.03–0.32) | | 0.08 (0.01–0.19) | | −1.83 (−1.95–−1.71) | | −1.54 (−1.67–−1.41) |
| Mozambique | 1438.39 (−770.74–4255.2) | 18997.4 (2236.19–40985.38) | | 62.31 (−8.89–160.02) | | 669.87 (121.92–1411.56) | | 26.3 (−6.94–68.97) | | | 160.52 (29.37–338.07) | | 1.18 (−0.02–2.93) | | 6.28 (1.29–12.84) | | 6.29 (6.06–6.53) | | 5.79 (5.58–6) |
| Myanmar | 8235.87 (279.17–19870.78) | 82097.44 (15679.73–164388.47) | | 287.58 (32.89–681.03) | | 2796.09 (596.05–5615.65) | | 34.53 (2.96–82.13) | | | 156.74 (33.04–313.31) | | 1.28 (0.18–2.94) | | 5.88 (1.3–11.68) | | 5.91 (5.39–6.44) | | 5.96 (5.47–6.45) |
| Namibia | 1268.25 (231.74–2694.7) | 3343.15 (731.66–6605.15) | | 50.74 (9.75–108.07) | | 137.77 (32.61–268.46) | | 205.71 (39.33–435.75) | | | 256.34 (59.64–502.31) | | 9.55 (1.86–19.81) | | 12.28 (2.68–24.77) | | 0.66 (0.27–1.04) | | 0.8 (0.42–1.18) |
| Nauru | 17.11 (2.24–39.01) | 20.46 (2.75–44.01) | | 0.5 (0.07–1.1) | | 0.58 (0.09–1.23) | | 312.31 (45.51–677.06) | | | 285.97 (49.32–608.13) | | 11.39 (1.81–23.98) | | 9.79 (1.73–20.82) | | −0.33 (−0.57–−0.08) | | −0.53 (−0.76–−0.3) |
| Nepal | 328.11 (−281.33–1656.38) | 12786.51 (2191.84–28830.66) | | 14.5 (−1.55–58.81) | | 484.14 (83.73–1095.26) | | 3.98 (−0.84–17.06) | | | 53.28 (9.54–120.73) | | 0.18 (0–0.66) | | 2.2 (0.36–5.04) | | 7.8 (6.47–9.14) | | 7.73 (6.48–9) |
| Netherlands | 26372.72 (3600.85–53527.36) | 20337.73 (2896.78–41211.28) | | 1431.41 (177.26–3011.61) | | 1232.11 (157.7–2526.31) | | 129.1 (18.66–261.59) | | | 53.62 (8.64–108.8) | | 6.92 (0.88–14.55) | | 3.04 (0.44–6.18) | | −3.3 (−3.55–−3.06) | | −3.17 (−3.44–−2.9) |
| New Zealand | 4367.08 (605.19–10249.21) | 4311.96 (635.06–8903.24) | | 234.41 (23.88–568.54) | | 260.04 (37.19–537.81) | | 111.64 (15.78–260) | | | 48.01 (7.1–98.91) | | 6.13 (0.61–14.93) | | 2.74 (0.41–5.64) | | −2.8 (−2.93–−2.67) | | −2.69 (−2.79–−2.58) |
| Nicaragua | 633.22 (135.38–1317.51) | 1271.34 (271.69–2584.77) | | 24.52 (5.71–49.58) | | 47.72 (10.91–96.18) | | 41.4 (9.59–84.52) | | | 25.2 (5.64–50.54) | | 1.74 (0.41–3.51) | | 1.02 (0.23–2.11) | | −1.5 (−1.77–−1.23) | | −1.55 (−1.87–−1.23) |
| Niger | 20.51 (−211.96–306.27) | 903.65 (−77.89–2957.54) | | 3.12 (−2.24–11.8) | | 40.27 (2.93–113.11) | | 2.92 (−2.6–11.86) | | | 12.84 (0.91–36.49) | | 0.17 (−0.02–0.54) | | 0.61 (0.06–1.75) | | 8.02 (6.26–9.82) | | 6.46 (5.03–7.91) |
| Nigeria | 80344.22 (19217.89–157697.34) | 113328.01 (24897.11–219255.38) | | 3276.86 (778.36–6495.72) | | 4519.64 (912.08–8935.61) | | 184.86 (43.81–362.69) | | | 129.29 (25.8–257.4) | | 8.46 (1.92–17.06) | | 6.16 (1.17–12.62) | | −1.51 (−1.72–−1.29) | | −1.34 (−1.53–−1.15) |
| Niue | 3.19 (0.2–7.06) | 3.03 (0.42–6.66) | | 0.12 (0.01–0.26) | | 0.11 (0.02–0.24) | | 152.55 (9.59–338.14) | | | 142.66 (19.48–313.56) | | 5.33 (0.36–11.89) | | 5.11 (0.73–11.06) | | −1.04 (−1.43–−0.66) | | −0.95 (−1.33–−0.56) |
| North Korea | 38226.23 (7402.06–72766.44) | 72093.45 (16267.2–135282.28) | | 1309.84 (266.13–2510.64) | | 2534.05 (597.84–4739.6) | | 221.91 (42.37–421.94) | | | 211.11 (47.73–392.04) | | 8.69 (1.8–16.67) | | 7.69 (1.81–14.25) | | −0.01 (−0.09-0.08) | | −0.22 (−0.32–−0.11) |
| North Macedonia | 8570.01 (1610.03–17322.81) | 9376.48 (1495.15–18726.1) | | 407.29 (57.37–858.99) | | 477.69 (62.57–999.63) | | 485.21 (85.83–994.34) | | | 301.81 (43.13–623.58) | | 24.97 (2.86–54.67) | | 17.5 (1.74–38.61) | | −2.05 (−2.33–−1.77) | | −1.72 (−2.11–−1.33) |
| Northern Mariana Islands | 20.87 (−0.6–61.13) | 41.05 (1.64–101.46) | | 0.55 (0–1.56) | | 1.33 (0.06–3.3) | | 82.95 (−0.34–235.26) | | | 73.88 (3.15–183.35) | | 3 (0–8.16) | | 2.77 (0.15–6.84) | | −1.01 (−1.33–−0.68) | | −0.93 (−1.24–−0.61) |
| Norway | 6217.54 (683.51–14015.62) | 3981.93 (587.57–8271.93) | | 346.89 (28.72–811.86) | | 212.41 (35.51–447.27) | | 85.41 (10.28–190.64) | | | 36.33 (5.86–75.67) | | 4.48 (0.44–10.41) | | 1.75 (0.3–3.63) | | −2.86 (−3.08–−2.63) | | −3.1 (−3.39–−2.81) |
| Oman | 66.14 (11.52–155.35) | 139.19 (23.12–334.78) | | 1.96 (0.34–4.68) | | 3.49 (0.57–8.38) | | 7.68 (1.34–18.73) | | | 4.61 (0.7–11.63) | | 0.28 (0.04–0.68) | | 0.17 (0.02–0.45) | | −1.85 (−2.75–−0.95) | | −1.65 (−2.53–−0.77) |
| Pakistan | 4943.01 (277.84–12589.92) | 20936.43 (3564.17–49576.84) | | 189.52 (17.7–467.11) | | 692.3 (127.68–1577.09) | | 8.88 (0.79–22.17) | | | 15.72 (2.83–35.82) | | 0.36 (0.04–0.9) | | 0.6 (0.1–1.34) | | 1.89 (1.62–2.17) | | 1.63 (1.37–1.89) |
| Palau | 15.91 (0.49–40.14) | 36.77 (5.43–85.94) | | 0.52 (0.02–1.3) | | 1.13 (0.17–2.65) | | 148.51 (6.46–370.98) | | | 153.76 (23.32–363.29) | | 5.48 (0.32–13.49) | | 5.41 (0.87–12.51) | | 0.16 (0.02–0.29) | | 0.01 (−0.13–0.15) |
| Palestine | 220.2 (38.22–482.82) | 333.43 (62.53–761.01) | | 8.6 (1.31–19.76) | | 11.34 (1.77–27.82) | | 24.36 (3.89–53.2) | | | 11.85 (1.86–28.69) | | 1.09 (0.15–2.62) | | 0.51 (0.07–1.28) | | −2.62 (−3.04–−2.21) | | −2.79 (−3.28–−2.31) |
| Panama | 1047.46 (237.63–2002.97) | 1822.35 (417.21–3679.28) | | 43.94 (10.34–89.98) | | 81.25 (17.17–175.55) | | 70.17 (15.86–135.29) | | | 41.07 (9.38–82.66) | | 3.1 (0.74–6.38) | | 1.81 (0.39–3.89) | | −1.95 (−2.2–−1.71) | | −1.99 (−2.22–−1.75) |
| Papua New Guinea | 1399.1 (125.39–3338.49) | 2636.1 (308.49–6235.87) | | 43.17 (3.86–102.13) | | 81.8 (9.81–194.75) | | 66.87 (7.02–156.18) | | | 44.33 (5.76–104.07) | | 2.52 (0.34–5.78) | | 1.72 (0.23–3.98) | | −0.95 (−1.47–−0.44) | | −0.81 (−1.34–−0.27) |
| Paraguay | 4581.81 (1064.13–8648.15) | 6355.87 (1419.76–12861.94) | | 195.12 (45.27–371.7) | | 278.33 (61.49–579.58) | | 205.27 (51.14–385.98) | | | 109.46 (24.26–223.36) | | 9.38 (2.02–18.01) | | 5.05 (1.15–10.51) | | −2.3 (−2.53–−2.07) | | −2.14 (−2.41–−1.87) |
| Peru | 9146.92 (1580.47–18956.69) | 14195.27 (2774.48–27747.77) | | 356.1 (79.96–702.84) | | 558.9 (124.7–1116.65) | | 75.24 (14.86–149.08) | | | 41.49 (8.49–80.21) | | 3.13 (0.73–6.12) | | 1.67 (0.37–3.35) | | −2.18 (−2.8–−1.55) | | −2.3 (−2.91–−1.7) |
| Philippines | 60235.2 (11257.79–113290.93) | 202302.68 (43952.38–376155.57) | | 2033.91 (444.47–3752.9) | | 6525.18 (1568.88–12071.91) | | 190.33 (42.05–350.37) | | | 221.97 (52.41–409.01) | | 7.82 (1.81–14.45) | | 8.02 (2.03–14.79) | | 0.82 (0.6–1.04) | | 0.42 (0.22–0.62) |
| Poland | 104649.09 (17489.19–211722.33) | 74583.45 (10737.8–158715.72) | | 4787.51 (560.33–10257.96) | | 3569.4 (396.82–7903.42) | | 241.7 (40.23–492.42) | | | 105.47 (16.57–217.67) | | 11.4 (1.28–24.62) | | 4.72 (0.62–10.28) | | −2.97 (−3.08–−2.85) | | −3.17 (−3.28–−3.06) |
| Portugal | 51176.93 (9328.62–104868.55) | 19272 (4019.19–37351.49) | | 2770.89 (366.36–5858.51) | | 1225.84 (232.85–2468.09) | | 373.79 (67.22–767.89) | | | 73 (14.78–136.84) | | 21.27 (2.65–45.82) | | 4.01 (0.87–7.9) | | −5.81 (−6.03–−5.6) | | −5.97 (−6.2–−5.74) |
| Puerto Rico | 1442.16 (316.62–2860.77) | 1179.84 (265.52–2433.05) | | 60.41 (12.73–121.79) | | 53.94 (10.83–112.7) | | 40.35 (8.96–80.19) | | | 18.71 (4.08–38.12) | | 1.73 (0.37–3.55) | | 0.71 (0.17–1.49) | | −3.08 (−3.34–−2.82) | | −3.43 (−3.69–−3.17) |
| Qatar | 23.22 (4.14–49.47) | 78.72 (14.54–177.91) | | 0.56 (0.1–1.23) | | 1.49 (0.28–3.41) | | 13.8 (2.73–30.87) | | | 4.08 (0.69–9.54) | | 0.57 (0.11–1.3) | | 0.15 (0.02–0.37) | | −4.04 (−4.76–−3.32) | | −4.55 (−5.47–−3.63) |
| Republic of Congo | 2046.96 (245.81–4617.28) | 5570.1 (1012.54–11793.4) | | 80.87 (10.66–178.34) | | 211.05 (43.74–425.32) | | 203.07 (27.96–445.81) | | | 216.69 (41.72–427.38) | | 9.22 (1.47–19.58) | | 10.18 (2.18–20.37) | | 0.76 (0.16–1.36) | | 0.87 (0.3–1.45) |
| Romania | 105069.02 (21862.25–201340.62) | 88691.44 (14247.46–178345.46) | | 4761.1 (765.39–9418.44) | | 4642.17 (627.6–9855.35) | | 389.03 (76.68–755.82) | | | 235.35 (44.39–466.97) | | 19.36 (2.69–39.63) | | 11.49 (1.65–24.07) | | −2.37 (−2.76–−1.99) | | −2.31 (−2.65–−1.96) |
| Russia | 513066.26 (65781.35–1106471.16) | 408631.72 (57923.99–892301.43) | | 20622.57 (1836.96–47560.47) | | 16316.82 (1553.67–38885.47) | | 281.33 (35.74–614.2) | | | 174.87 (26.45–380.19) | | 11.83 (0.98–27.83) | | 6.8 (0.75–16.01) | | −2.57 (−3.36–−1.76) | | −2.82 (−3.62–−2.02) |
| Rwanda | 15826.35 (1611.2–33633.24) | 11197.43 (1945.17–23845.31) | | 550.38 (67.84–1105.66) | | 404.48 (78.29–836.8) | | 523.51 (68.01–1047.78) | | | 169.58 (34.59–346.23) | | 20.95 (3.82–40.41) | | 7.25 (1.47–14.41) | | −5.01 (−5.55–−4.47) | | −4.72 (−5.23–−4.21) |
| Saint Kitts and Nevis | 66.27 (−0.3–143.14) | 50.04 (−0.09–142.88) | | 2.93 (0–6.52) | | 1.93 (0–5.58) | | 186.53 (−0.63–399.86) | | | 68.44 (−0.2–196.4) | | 7.83 (0–17.33) | | 3.01 (0–9.29) | | −3.6 (−3.95–−3.24) | | −3.37 (−3.68–−3.06) |
| Saint Lucia | 208.65 (47.75–404.95) | 260.21 (61.46–517.13) | | 8.55 (2–17.29) | | 11.52 (2.65–23.64) | | 241.98 (58.11–474.52) | | | 108.18 (25.78–213.76) | | 10.52 (2.36–21.53) | | 4.9 (1.09–10.11) | | −2.98 (−3.25–−2.7) | | −3 (−3.34–−2.65) |
| Saint Vincent and the Grenadines | 86.04 (17.4–175.28) | 186.66 (45.2–364.83) | | 3.68 (0.8–7.31) | | 7.92 (1.84–15.6) | | 122.49 (26.19–242.28) | | | 131.34 (31.91–254.79) | | 5.22 (1.14–10.33) | | 5.79 (1.27–11.38) | | 0.12 (−0.16–0.4) | | 0.31 (0–0.63) |
| Samoa | 117.4 (15.86–272.16) | 111.77 (16.8–254.52) | | 3.96 (0.54–9.1) | | 3.61 (0.53–8.36) | | 128.64 (17.75–295.27) | | | 71.88 (11.33–162.53) | | 4.78 (0.71–10.82) | | 2.56 (0.36–5.9) | | −2.11 (−2.36–−1.87) | | −2.3 (−2.59–−2.01) |
| San Marino | 38.95 (−0.12–92.08) | 33.92 (−0.09–83.81) | | 2.31 (0–5.59) | | 2.07 (0–5.32) | | 106.45 (−0.38–250.18) | | | 39.81 (−0.28–97.1) | | 6.12 (−0.01–14.73) | | 1.98 (−0.01–5.01) | | −2.67 (−2.94–−2.41) | | −2.92 (−3.28–−2.56) |
| Sao Tome and Principe | 97 (18.79–198.85) | 211.69 (46.36–408.15) | | 3.84 (0.78–7.62) | | 7.77 (1.67–14.9) | | 150.58 (29.35–306.44) | | | 185.05 (39.84–359.29) | | 6.37 (1.26–12.73) | | 8.08 (1.63–15.79) | | 0.24 (−0.15–0.63) | | 0.45 (0.08–0.81) |
| Saudi Arabia | 527.1 (73.4–1307.4) | 913.84 (81.14–2391.95) | | 16.92 (2.22–41.82) | | 23.68 (2.15–65.36) | | 7.55 (0.97–18.99) | | | 3.03 (0.23–8.65) | | 0.3 (0.03–0.78) | | 0.11 (0.01–0.32) | | −1.6 (−2.17–−1.03) | | −1.91 (−2.44–−1.37) |
| Senegal | 1292.84 (10.27–3404.07) | 1684.87 (151.56–4238.05) | | 54.83 (3.29–136.12) | | 73.09 (8.96–174.53) | | 43.35 (2.46–108.34) | | | 23.59 (3.02–56.42) | | 1.93 (0.22–4.8) | | 1.09 (0.13–2.51) | | −2.45 (−2.95–−1.95) | | −2.33 (−2.8–−1.86) |
| Serbia | 36120.62 (6052.67–74200.27) | 32863.44 (4602.94–71992.99) | | 1650.84 (226.64–3577.12) | | 1778.19 (182.64–4119.84) | | 351.77 (52.19–741.1) | | | 194.2 (28.66–420.56) | | 18.41 (2–41.33) | | 10.18 (1.15–23.54) | | −2.35 (−2.6–−2.1) | | −2.25 (−2.45–−2.04) |
| Seychelles | 76.19 (16.45–143.79) | 100.42 (24.33–192.3) | | 2.73 (0.6–5.17) | | 3.26 (0.8–6.1) | | 136.94 (29.35–257.5) | | | 80.6 (19.42–155.01) | | 4.87 (1.07–9.18) | | 2.83 (0.62–5.44) | | −1.69 (−1.91–−1.47) | | −1.7 (−1.97–−1.44) |
| Sierra Leone | 4037.12 (870.27–7850.19) | 5434.85 (1111.18–10767.68) | | 155.78 (31.21–306.43) | | 194.66 (40.43–376.3) | | 195.25 (41.48–377.29) | | | 136.54 (28.74–263.2) | | 8.2 (1.59–16.32) | | 5.66 (1.15–11.47) | | −1.15 (−1.35–−0.95) | | −1.24 (−1.45–−1.03) |
| Singapore | 1104.55 (174.77–2153.84) | 826.66 (128.84–1649.29) | | 36.65 (7.19–72.68) | | 21.29 (3.81–41.53) | | 48.11 (9.04–95.79) | | | 9.28 (1.4–18.92) | | 1.75 (0.34–3.43) | | 0.25 (0.04–0.49) | | −5.85 (−6.23–−5.47) | | −6.68 (−6.99–−6.37) |
| Slovakia | 20965.92 (3715.85–41464.46) | 13754.89 (1925.95–28590.08) | | 931.08 (134.94–1871.87) | | 625.64 (77.12–1357.67) | | 351.73 (62.45–697.64) | | | 143.01 (21.2–296.15) | | 15.87 (2.26–32.12) | | 6.44 (0.8–13.93) | | −3.07 (−3.18–−2.96) | | −3.11 (−3.23–−2.98) |
| Slovenia | 5563.79 (811.66–11063.45) | 2032.8 (156.19–5020.07) | | 272.89 (26.76–571.26) | | 118.11 (6.97–300.99) | | 225.43 (33.48–449.67) | | | 42.01 (3.7–102.87) | | 11.08 (1.09–23.45) | | 2.23 (0.16–5.54) | | −5.78 (−6.07–−5.49) | | −5.46 (−5.77–−5.14) |
| Solomon Islands | 46.55 (1.83–121.45) | 234.15 (17.71–581.31) | | 1.46 (0.07–3.71) | | 6.85 (0.62–16.74) | | 30.73 (1.6–77.18) | | | 55.71 (5.4–135.29) | | 1.1 (0.07–2.72) | | 1.95 (0.23–4.63) | | 3.19 (2.38–3.99) | | 3.1 (2.3–3.9) |
| Somalia | 0 (0–0) | 0 (0–0) | | 0 (0–0) | | 0 (0–0) | | 0 (0–0) | | | 0 (0–0) | | 0 (0–0) | | 0 (0–0) | | 0 (0–0) | | 0 (0–0) |
| South Africa | 29860.36 (6050.28–60151.87) | 58236.66 (13205.39–112889.26) | | 1072.03 (250.49–2089.54) | | 2260.76 (563.83–4488.44) | | 139.68 (31.19–277.95) | | | 124.85 (30.57–240.92) | | 5.6 (1.2–11.13) | | 5.43 (1.26–10.83) | | −0.61 (−1.07–−0.15) | | −0.35 (−0.87-0.18) |
| South Korea | 104883.29 (23200.25–192878.82) | 58625.01 (10319.25–120539.33) | | 3844.7 (929.53–7161.6) | | 2483.19 (458.27–5242.07) | | 355.5 (80.66–661.85) | | | 63.56 (10.85–131.28) | | 15.8 (3.5–29.68) | | 2.69 (0.49–5.69) | | −6.07 (−6.32–−5.82) | | −6.29 (−6.54–−6.04) |
| South Sudan | 169.38 (−258.05–794.63) | 148.24 (−253.1–784.13) | | 9.62 (−2.88–32.1) | | 7.9 (−3.75–28.65) | | 8.94 (−5.23–32.62) | | | 5.41 (−2.79–19.89) | | 0.43 (−0.05–1.33) | | 0.26 (−0.03–0.86) | | −1.27 (−1.91–−0.61) | | −1.4 (−1.93–−0.87) |
| Spain | 81682.69 (13765.67–167163.65) | 42712.36 (7716.14–84882.16) | | 4523.26 (585.74–9496.56) | | 2333.62 (455.87–4688.53) | | 151.5 (26.51–310.47) | | | 41 (7.92–79.66) | | 8.44 (1.08–17.71) | | 1.87 (0.35–3.63) | | −4.39 (−4.61–−4.16) | | −5.02 (−5.25–−4.79) |
| Sri Lanka | 8589.39 (1811.07–17191.75) | 16054.19 (3455.35–33838.69) | | 339.1 (72.56–684.59) | | 682.37 (138.04–1505.33) | | 81.04 (17.08–161.94) | | | 60.16 (12.97–126.34) | | 3.79 (0.79–7.94) | | 2.73 (0.56–6.11) | | −0.85 (−1.22–−0.48) | | −0.73 (−1.11–−0.35) |
| Sudan | 6106.58 (1226.61–13207.35) | −6.66 (−58.96–5.09) | | 213.69 (42.7–469.71) | | −0.06 (−0.72–0.24) | | 61 (12.66–133.81) | | | −0.01 (−0.11–0.03) | | 2.44 (0.46–5.4) | | 0 (0–0) | | −12.75 (−13.89–−11.58) | | −12.75 (−13.89–−11.58) |
| Suriname | 400.3 (82.47–796.86) | 661.61 (149.63–1293.19) | | 14.6 (3.37–28.6) | | 24.42 (5.68–50) | | 150.08 (31.67–296.67) | | | 100.35 (22.85–196.68) | | 5.87 (1.41–11.52) | | 3.85 (0.91–7.92) | | −1.35 (−1.58–−1.12) | | −1.35 (−1.6–−1.09) |
| Sweden | 17045.55 (2120.03–36497.24) | 10472.11 (1589.09–21540.57) | | 980.32 (100.62–2096.12) | | 606.05 (87.28–1280.06) | | 105.73 (14.11–224.64) | | | 43.4 (7.23–88.14) | | 5.73 (0.66–12.16) | | 2.2 (0.36–4.55) | | −2.96 (−3.05–−2.88) | | −3.12 (−3.25–−2.98) |
| Switzerland | 13105.5 (1770.96–26781.1) | 6808.16 (910.8–13576.92) | | 812.33 (78.59–1725.66) | | 414.71 (49.82–859.15) | | 117.42 (17.04–237.42) | | | 32.84 (5.15–65.46) | | 6.95 (0.77–14.66) | | 1.73 (0.27–3.5) | | −4.03 (−4.1–−3.97) | | −4.34 (−4.39–−4.28) |
| Syria | 1853.85 (380.24–4012.69) | 1518.87 (241.02–3593.11) | | 58.39 (11.68–128.93) | | 52.75 (7.01–131.42) | | 30.42 (6.2–66.13) | | | 11.12 (1.64–27.14) | | 1.15 (0.2–2.61) | | 0.46 (0.06–1.12) | | −3.76 (−4.04–−3.47) | | −3.5 (−3.85–−3.16) |
| Taiwan | 30880.17 (6677.19–56905.07) | 18057.82 (4546.58–34131.73) | | 1095.29 (245.52–2017.71) | | 620.3 (148.42–1196.16) | | 187.6 (41.53–345.72) | | | 45.04 (10.8–85.39) | | 7.38 (1.8–13.59) | | 1.47 (0.34–2.84) | | −4.92 (−5.35–−4.48) | | −5.57 (−6.03–−5.12) |
| Tajikistan | 1867.57 (423.87–3789.56) | 2280.43 (454.11–4707.16) | | 53.28 (12.31–110.57) | | 63.13 (12.56–134.05) | | 61.12 (14.16–124.96) | | | 30.4 (6.12–64.26) | | 1.8 (0.41–3.78) | | 0.93 (0.18–2.06) | | −2.74 (−2.93–−2.54) | | −2.51 (−2.69–−2.34) |
| Tanzania | 17815.98 (2838.19–38337.77) | 32981.43 (7434.08–66389.66) | | 677.99 (119.6–1424.27) | | 1325.8 (320.83–2572.4) | | 162.32 (28.83–342.39) | | | 133.67 (31.76–262.1) | | 7.07 (1.35–14.84) | | 6.2 (1.55–11.99) | | −0.8 (−0.87–−0.73) | | −0.5 (−0.57–−0.44) |
| Thailand | 44574.23 (8941.34–88424.4) | 88832.35 (20691.52–169626.51) | | 1477.42 (315.23–2825.17) | | 3021.13 (756.29–6000.71) | | 115.74 (24.82–221.87) | | | 87.18 (19.97–166.79) | | 4.39 (1.01–8.35) | | 2.85 (0.7–5.65) | | −1.35 (−1.55–−1.14) | | −1.9 (−2.12–−1.69) |
| Timor-Leste | 235.64 (37.2–515.66) | 1137.79 (259.14–2344.62) | | 7.61 (1.41–16.15) | | 42.42 (9.56–86.17) | | 75.51 (14.52–155.79) | | | 129.67 (28.86–263.35) | | 3.01 (0.63–6.1) | | 5.28 (1.23–10.62) | | 1.64 (1.39–1.88) | | 1.71 (1.49–1.92) |
| Togo | 1903.57 (341.36–4083.85) | 5463.33 (1116.33–11471.42) | | 67.72 (13.45–146) | | 185.83 (42.89–384.73) | | 149.4 (29.65–321.52) | | | 131.68 (30.09–269.85) | | 6.2 (1.15–13.03) | | 5.4 (1.18–11.31) | | −0.17 (−0.31–−0.03) | | −0.25 (−0.39–−0.11) |
| Tokelau | 1.38 (0.14–3.5) | 1.33 (0.18–2.93) | | 0.05 (0.01–0.13) | | 0.05 (0.01–0.11) | | 102.25 (9.96–255.38) | | | 91.39 (12.51–201.41) | | 4.02 (0.43–10.01) | | 3.46 (0.55–7.55) | | −0.45 (−0.49–−0.4) | | −0.56 (−0.61–−0.51) |
| Tonga | 13.65 (1.94–30.57) | 13 (1.63–31.75) | | 0.48 (0.07–1.08) | | 0.47 (0.06–1.14) | | 23.87 (3.57–54) | | | 15.97 (2.07–38.59) | | 0.91 (0.15–2.08) | | 0.6 (0.08–1.46) | | −1.56 (−2.28–−0.83) | | −1.64 (−2.39–−0.89) |
| Trinidad and Tobago | 1158.54 (256.43–2383.62) | 1510.6 (335–3064.16) | | 47 (9.32–98.36) | | 64.37 (12.13–139) | | 137.98 (30.13–284.15) | | | 78.05 (17.25–159.3) | | 5.99 (1.11–12.85) | | 3.37 (0.62–7.28) | | −1.89 (−2.07–−1.71) | | −1.84 (−2.01–−1.67) |
| Tunisia | 892.17 (183.97–2007.73) | 1917.62 (295.84–4475.83) | | 32.09 (5.63–75.55) | | 71.84 (9.52–176.7) | | 16.96 (3.37–39.1) | | | 14.31 (2.15–33.78) | | 0.7 (0.12–1.67) | | 0.57 (0.07–1.4) | | −0.92 (−1.06–−0.78) | | −1.07 (−1.23–−0.91) |
| Turkey | 16083.66 (3392.22–33626.12) | 16775.77 (3589.47–36700.47) | | 538.78 (105.25–1131.26) | | 659.99 (114.98–1491.56) | | 42.97 (8.71–90.43) | | | 17.81 (3.78–39) | | 1.64 (0.29–3.5) | | 0.74 (0.12–1.69) | | −3.44 (−3.79–−3.09) | | −3.07 (−3.46–−2.68) |
| Turkmenistan | 1970.61 (382.42–4112.26) | 9413.49 (1822.54–19075.02) | | 63.03 (11.16–136.41) | | 305.08 (55.58–637.86) | | 95.91 (18.57–202.56) | | | 211.69 (38.71–434.22) | | 3.25 (0.58–7.31) | | 7.57 (1.23–16.63) | | 2.59 (1.89–3.28) | | 2.76 (2.05–3.48) |
| Tuvalu | 7.97 (0.76–19.99) | 10.26 (1.37–23.31) | | 0.26 (0.03–0.65) | | 0.33 (0.05–0.75) | | 108.16 (11.02–267.54) | | | 93.51 (13.69–209.11) | | 3.87 (0.49–9.53) | | 3.27 (0.51–7.31) | | −0.61 (−1.09–−0.13) | | −0.7 (−1.17–−0.23) |
| Uganda | 12911.66 (1711.59–25987.79) | 23642.51 (4212.36–50292.13) | | 467.97 (72.75–941.1) | | 810.66 (153.74–1669.81) | | 192.86 (29.06–384.86) | | | 149 (29.71–304.18) | | 7.81 (1.38–15.73) | | 6.01 (1.28–12.07) | | −1.56 (−1.88–−1.25) | | −1.51 (−1.79–−1.22) |
| UK | 117959.02 (12993.4–250846.71) | 62874.19 (10788.72–125447.39) | | 6716.25 (505.39–14648.29) | | 3593.15 (628.8–7248.67) | | 125.05 (15.98–264.3) | | | 45.35 (8.17–89.83) | | 6.92 (0.59–15.04) | | 2.32 (0.42–4.62) | | −3.56 (−3.8–−3.31) | | −3.79 (−4.08–−3.49) |
| Ukraine | 173629.94 (21687.11–383649.64) | 117298.42 (19900.06–282694.85) | | 7311.17 (685.69–16939.91) | | 4711.11 (549.66–12317.4) | | 241.25 (29.91–537.63) | | | 156.44 (27.52–369.8) | | 10.48 (0.94–24.98) | | 6.03 (0.83–15.56) | | −1.72 (−2.24–−1.21) | | −2.12 (−2.61–−1.62) |
| United Arab Emirates | 438.25 (76.07–909.79) | 1317.21 (230.76–2934.33) | | 11.62 (1.96–24.44) | | 26.41 (4.83–60.57) | | 71.98 (11.17–157.69) | | | 24.57 (2.9–60.97) | | 2.92 (0.43–6.56) | | 1.12 (0.11–2.79) | | −2.98 (−3.19–−2.76) | | −2.14 (−2.49–−1.79) |
| Uruguay | 7708.82 (1503.63–14850.08) | 4367.88 (768.47–8842.2) | | 358.47 (63.18–724.29) | | 236.4 (32.41–494.99) | | 200.06 (40.79–386.54) | | | 76.86 (14.87–154.11) | | 9.22 (1.55–18.62) | | 3.71 (0.61–7.6) | | −3.41 (−3.61–−3.21) | | −3.17 (−3.4–−2.94) |
| USA | 151332.66 (27073.75–378045.75) | 277616.33 (51731.59–584068.23) | | 6499.89 (942.57–17374.73) | | 12464.4 (2122.24–27347.7) | | 48.32 (9.33–117.88) | | | 48.87 (9.61–101.19) | | 1.97 (0.31–5.18) | | 1.99 (0.37–4.26) | | −0.05 (−0.15-0.05) | | −1.17 (−1.31–−1.04) |
| Uzbekistan | 12968.55 (2680.91–26400.71) | 26134.52 (5252.94–54503.19) | | 402.5 (77.82–845.28) | | 826.03 (162.23–1780.25) | | 106.99 (22.11–216.05) | | | 89.46 (17.21–191.69) | | 3.44 (0.66–7.28) | | 3.22 (0.58–7.23) | | −1.08 (−1.4–−0.76) | | −0.67 (−1.01–−0.33) |
| Vanuatu | 86.45 (9.3–201.69) | 229.29 (28.97–522.94) | | 2.55 (0.32–5.94) | | 6.57 (0.84–14.66) | | 115.04 (14.18–264.03) | | | 109.29 (14.72–242.41) | | 4.11 (0.53–9.14) | | 3.76 (0.57–8.3) | | 0.01 (−1.04–1.07) | | −0.11 (−1.16-0.96) |
| Venezuela | 9471.92 (1975.21–18409.55) | 14173.14 (3133.23–29595.53) | | 357.79 (82.58–679.21) | | 557.65 (128.18–1216.53) | | 94.65 (21.71–183.56) | | | 46.13 (10.33–97.97) | | 3.94 (0.99–7.54) | | 1.9 (0.44–4.13) | | −2.89 (−3.08–−2.7) | | −2.85 (−3.04–−2.67) |
| Vietnam | 5273.93 (−1180.96–14996.07) | 385029.67 (91813.07–704201.77) | | 264.81 (8.13–655.04) | | 15006.12 (3642.86–27022.78) | | 15.6 (−0.99–40.25) | | | 378.5 (84.09–688.25) | | 0.72 (0.03–1.74) | | 16.22 (4.02–29.11) | | 10.27 (8.69–11.88) | | 10.13 (8.6–11.69) |
| Virgin Islands | 63.71 (−0.66–179.12) | 81 (0.9–201.22) | | 2.48 (−0.01–7.31) | | 3.84 (0.06–9.63) | | 73.52 (−0.66–219.46) | | | 47.15 (−0.26–115.8) | | 3.32 (−0.01–10.31) | | 2.15 (0.02–5.46) | | −1.21 (−1.35–−1.07) | | −0.09 (−0.24-0.06) |
| Yemen | 2154.62 (430.03–4547.49) | 1490.78 (295.43–3564.41) | | 69.05 (14.5–150.74) | | 47.61 (8.77–115.18) | | 38.38 (8.01–83.76) | | | 8.93 (1.64–21.6) | | 1.42 (0.31–3.2) | | 0.35 (0.05–0.85) | | −5.38 (−5.74–−5.03) | | −5.26 (−5.61–−4.9) |
| Zambia | 5879.53 (701.28–12499.16) | 14806.44 (2672.2–32138.34) | | 220.71 (31.32–450.04) | | 528.05 (105.4–1102.51) | | 206.95 (30.74–420.63) | | | 204.88 (42.33–421.73) | | 9.09 (1.68–17.93) | | 8.89 (2.02–18.11) | | −0.26 (−0.41–−0.12) | | −0.24 (−0.39–−0.09) |
| Zimbabwe | 4602.07 (993.5–8945.65) | 10304.46 (1818.11–20889.64) | | 186.29 (42.84–360.37) | | 383.18 (75.14–747.97) | | 118.51 (25.88–231.09) | | | 149.35 (29.96–287.67) | | 5.46 (1.17–10.52) | | 6.52 (1.46–12.79) | | 1.04 (0.96–1.12) | | 0.98 (0.89–1.06) |
| DALYs, disability-adjusted life years; ASR, age-standardized rate; ASDR, age-standardized DALY rate; ASMR, age-standardized mortality rate; EAPC, estimated annual percentage change; UI, uncertainty interval; CI, confidence interval. | | | | | | | | | | | | | | | | | | | |
